# Supplementary material for: Genome-Wide Identification of Different Dormant Medicago sativa L. MicroRNAs in Response to Fall Dormancy
Source: PLoS One. 2014 Dec 4;9(12):e114612. doi: 10.1371/journal.pone.0114612 (PMC4256440; doi:10.1371/journal.pone.0114612)
Supplement: Table S9 — Comparison between DS3 and NS4 of the normalized expressions of differential miRNAs. (XLS) [file pone.0114612.s014.xls]

## Sheet: DEmirna4v3
GeneNames	value1	value2	log2.Fold_change.	q.value.Storey.et.al..2003.
mtr-miR172a	146.816	0	8.19786	6.03156e-32
mtr-miR5281a	73.4079	0	7.19786	1.56657e-18
mtr-miR5231	36.704	0	6.19786	7.58041e-11
mtr-miR482-5p	36.704	0	6.19786	7.58041e-11
mtr-miR5297	18.352	0	5.19786	1.25285e-06
mtr-miR5286b	18.352	0	5.19786	1.25285e-06
mtr-miR5284a	18.352	0	5.19786	1.25285e-06
mtr-miR5267l	18.352	0	5.19786	1.25285e-06
mtr-miR5249	18.352	0	5.19786	1.25285e-06
mtr-miR2676a	18.352	0	5.19786	1.25285e-06
mtr-miR2634	18.352	0	5.19786	1.25285e-06
mtr-miR2616	18.352	0	5.19786	1.25285e-06
mtr-miR2593e	18.352	0	5.19786	1.25285e-06
mtr-miR156d-3p	110.112	15.911	2.79088	1.56657e-18
mtr-miR5269b	91.7599	15.911	2.52784	1.95596e-14
mtr-miR5290	146.816	31.822	2.20591	1.43483e-18
mtr-miR5752a	55.0559	15.911	1.79088	5.85614e-07
mtr-miR2603	55.0559	15.911	1.79088	5.85614e-07
mtr-miR2629h	91.7599	31.822	1.52784	2.32722e-08
mtr-miR5277	642.319	254.576	1.3352	1.78295e-35
mtr-miR2199	734.079	302.309	1.27991	1.34669e-37
mtr-miR408-5p	532.207	222.754	1.25654	3.51334e-27
mtr-miR5286a	36.704	15.911	1.20591	0.000543734
mtr-miR5241a	36.704	15.911	1.20591	0.000543734
mtr-miR2629a	679.023	318.22	1.09344	3.51179e-27
mtr-miR166g-5p	9304.45	4582.36	1.02183	1.92433e-303
mtr-miR1510b-5p	73.4079	159.11	-1.11602	1.2411e-10
mtr-miR2643a	642.319	1495.63	-1.21939	1.17125e-89
mtr-miR396b-5p	8570.37	21209.3	-1.30727	0
mtr-miR5299	18.352	47.7329	-1.37905	8.08429e-06
mtr-miR5287a	36.704	95.4659	-1.37905	3.96151e-09
mtr-miR398a-3p	36.704	95.4659	-1.37905	3.96151e-09
mtr-miR5559-5p	440.447	1225.15	-1.47591	5.21788e-96
mtr-miR5743a	36.704	111.377	-1.60144	5.31681e-12
mtr-miR156b-5p	2440.81	8416.91	-1.78593	0
mtr-miR393a	55.0559	206.843	-1.90956	1.07881e-24
mtr-miR5234	18.352	143.199	-2.96401	2.23591e-27
mtr-miR156e	18.352	206.843	-3.49453	1.14738e-43
mtr-miR5279	0	15.911	-4.99195	2.52342e-06
mtr-miR5266	0	15.911	-4.99195	2.52342e-06
mtr-miR5244	0	15.911	-4.99195	2.52342e-06
mtr-miR399b	0	15.911	-4.99195	2.52342e-06
mtr-miR2674	0	15.911	-4.99195	2.52342e-06
mtr-miR2655b	0	15.911	-4.99195	2.52342e-06
mtr-miR172d-5p	0	15.911	-4.99195	2.52342e-06
mtr-miR164d	0	15.911	-4.99195	2.52342e-06
mtr-miR164a	0	15.911	-4.99195	2.52342e-06
mtr-miR156g-3p	0	15.911	-4.99195	2.52342e-06
mtr-miR1509a-3p	0	15.911	-4.99195	2.52342e-06
mtr-miR5228	0	31.822	-5.99195	3.38e-10
mtr-miR5205b	0	31.822	-5.99195	3.38e-10
mtr-miR156a	0	31.822	-5.99195	3.38e-10
mtr-miR2592bl-5p	0	47.7329	-6.57691	7.55058e-14
mtr-miR5248	0	79.5549	-7.31388	1.511e-20
